# Supplementary material
Source: publisher figshare collection journal article supplement (https://gsajournals.figshare.com/ndownloader/files/24115841)
Supplement: Supplementary file 1 [file 24115841]

## Sheet: Sheet1
Table S7 Annotation summary for 653 species-specific giant sequoia orthogroups
	Total Sequences:	653
	Similarity Search
	Total unique sequences with an alignment	232
	Total unique sequences without an alignment	431
	Gene Families
	Total unique sequences with family assignment	593
	Total unique sequences without family assignment	60
	Total unique sequences with at least one GO term	505
	Total unique sequences with at least one pathway (KEGG) assignment	145
	Totals
	Total unique sequences annotated (similarity search alignments only)	6
	Total unique sequences annotated (gene family assignment only)	367
	Total unique sequences annotated (gene family and/or similarity search)	599
	Total unique sequences unannotated (gene family and/or similarity search):	54
